# Supplementary material for: The Omega-3 Index is Inversely Associated with the Neutrophil-Lymphocyte Ratio in Adults
Source: bioRxiv or medRxiv preprint supplement (doi:10.1101/2021.10.22.21264656), 2021-12-14
Supplement: Supplementary file [file media-1.pdf]

## **The Omega-3 Index is Inversely Associated with the Neutrophil-Lymphocyte Ratio in Adults**

Michael I. McBurney<sup>1-3</sup>, Nathan L. Tintle<sup>1,4</sup>, William S. Harris<sup>1,5</sup>

<sup>1</sup>Fatty Acid Research Institute, Sioux Falls, SD 57106, USA (MIM, NLT, WSH); <sup>2</sup>Department of Human Health and Nutritional Sciences, University of Guelph, Guelph, ON N1G 2W1, Canada (MIM), <sup>3</sup>Division of Biochemical and Molecular Biology, Friedman School of Nutrition Science and Policy, Tufts University, Boston, MA 02111, USA (MIM); <sup>4</sup>Department of Population Health Nursing Science, College of Nursing, University of Illinois – Chicago, Chicago, IL 60612, USA(NLT); <sup>5</sup>Sanford School of Medicine, University of South Dakota, Sioux Falls, SD 57105, USA (WSH).

| Supplemental Table 1. Associations of a low neutrophil-lymphocyte ratio (NLR) and a low Omega-3 Index (O3I) with adverse clinical events. |                                 |                                                         |                                              |                                                  |
|-------------------------------------------------------------------------------------------------------------------------------------------|---------------------------------|---------------------------------------------------------|----------------------------------------------|--------------------------------------------------|
| Condition or Outcome                                                                                                                      | Lower NLR                       |                                                         | Higher O3I                                   |                                                  |
|                                                                                                                                           | Setting                         | Finding                                                 | Setting                                      | Finding                                          |
| Dry Eye Disease                                                                                                                           | Case Control                    | Less likely to be a case [1]                            | Meta-analysis RCTs                           | Improves [2]                                     |
| Inflammatory markers                                                                                                                      | 389 in smoking cessation study  | Lower biomarker levels [3]                              | Framingham                                   | Lower levels [4]                                 |
| CV Events                                                                                                                                 | Meta-analysis of lipid RCTs     | Predicted lower event rates regardless of treatment [5] | Meta-analysis of om3 RCTs                    | Reduced Risk [6]                                 |
| Cancer mortality                                                                                                                          | NHANES (within 1 year of death) | Lower odds of dying [7]                                 | FORCE meta-analysis                          | Reduced Risk [8]                                 |
| All-cause mortality                                                                                                                       | Jackson Heart Study             | Lower risk for death [9]                                | FORCE meta-analysis                          | Reduced Risk [8]                                 |
| CHD mortality                                                                                                                             | NHANES                          | Improves on FRS prediction [10]                         | FORCE meta-analysis                          | Reduced Risk [8]                                 |
| HF morbidity and mortality                                                                                                                | 1212 patients with acute HF     | Lower risk for death [11]                               | GISSI-HF trial<br>CHS observational study    | Reduced mortality [12, 13] and HF incidence [14] |
| Depression                                                                                                                                | Meta-analysis cases vs controls | Lower risk [15]                                         | Meta-analysis cases vs controls              | Reduced risk [16]                                |
| COVID-19                                                                                                                                  | Chinese patients                | Better outcomes [17]                                    | 100 US patients<br>79 Chilean patients       | Reduced risk for death [18, 19]                  |
| Ischemic stroke                                                                                                                           | Retrospective in 25K Koreans    | Lower risk [20]                                         | 3 US prospective cohorts and Chinese biobank | Lower risk [21, 22]                              |

## References

[1] Y.F. Meng, Q. Pu, Q. Ma, W. Zhu, X.Y. Li, Neutrophil/Lymphocyte Ratio as an Inflammatory Predictor of Dry Eye Disease: A Case-Control Study, *Ther Clin Risk Manag*, 17 (2021) 259-266.

- [2] G. Giannaccare, M. Pellegrini, S. Sebastiani, F. Bernabei, M. Roda, L. Taroni, P. Versura, E.C. Campos, Efficacy of Omega-3 Fatty Acid Supplementation for Treatment of Dry Eye Disease: A Meta-Analysis of Randomized Clinical Trials, *Cornea*, 38 (2019) 565-573.
- [3] M. Komiyama, Y. Ozaki, Y. Miyazaki, Y. Katanasaka, Y. Sunagawa, M. Funamoto, K. Shimizu, H. Yamakage, N. Sato-Asahara, A. Yasoda, H. Wada, T. Morimoto, K. Hasegawa, Neutrophil/lymphocyte ratio is correlated with levels of inflammatory markers and is significantly reduced by smoking cessation, *The Journal of international medical research*, 49 (2021) 3000605211019223.
- [4] J.D. Fontes, F. Rahman, S. Lacey, M.G. Larson, R.S. Vasan, E.J. Benjamin, W.S. Harris, S.J. Robins, Red blood cell fatty acids and biomarkers of inflammation: A cross-sectional study in a community-based cohort, *Atherosclerosis*, 240 (2015) 431-436.
- [5] N.H. Adamstein, J.G. MacFadyen, L.M. Rose, R.J. Glynn, A.K. Dey, P. Libby, I.A. Tabas, N.N. Mehta, P.M. Ridker, The neutrophil-lymphocyte ratio and incident atherosclerotic events: analyses from five contemporary randomized trials, *Eur Heart J*, 42 (2021) 896-903.
- [6] A.A. Bernasconi, M.M. Wiest, C.J. Lavie, R.V. Milani, J.A. Laukkanen, Effect of Omega-3 Dosage on Cardiovascular Outcomes: An Updated Meta-Analysis and Meta-Regression of Interventional Trials, *Mayo Clinic proceedings*, 96 (2021) 304-313.
- [7] M. Song, B.I. Graubard, C.S. Rabkin, E.A. Engels, Neutrophil-to-lymphocyte ratio and mortality in the United States general population, *Scientific reports*, 11 (2021) 464.
- [8] W.S. Harris, N.L. Tintle, F. Imamura, F. Qian, A.V.A. Korat, M. Marklund, L. Djoussé, J.K. Bassett, P.H. Carmichael, Y.Y. Chen, Y. Hirakawa, L.K. Küpers, F. Laguzzi, M. Lankinen, R.A. Murphy, C. Samieri, M.K. Senn, P. Shi, J.K. Virtanen, I.A. Brouwer, K.L. Chien, G. Eiriksdottir, N.G. Forouhi, J.M. Geleijnse, G.G. Giles, V. Gudnason, C. Helmer, A. Hodge, R. Jackson, K.T. Khaw, M. Laakso, H. Lai, D. Laurin, K. Leander, J. Lindsay, R. Micha, J. Mursu, T. Ninomiya, W. Post, B.M. Psaty, U. Risérus, J.G. Robinson, A.H. Shadyab, L. Snetselaar, A. Sala-Vila, Y. Sun, L.M. Steffen, M.Y. Tsai, N.J.

Wareham, A.C. Wood, J.H.Y. Wu, F. Hu, Q. Sun, D.S. Siscovick, R.N. Lemaitre, D. Mozaffarian, Blood n-3 fatty acid levels and total and cause-specific mortality from 17 prospective studies, *Nat Commun*, 12 (2021) 2329.

[9] S. Kim, M. Eliot, D.C. Koestler, W.-C. Wu, K.T. Kelsey, Association of Neutrophil-to-Lymphocyte Ratio With Mortality and Cardiovascular Disease in the Jackson Heart Study and Modification by the Duffy Antigen Variant, *JAMA cardiology*, 3 (2018) 455-462.

[10] N. Shah, V. Parikh, N. Patel, N. Patel, A. Badheka, A. Deshmukh, A. Rathod, J. Lafferty, Neutrophil lymphocyte ratio significantly improves the Framingham risk score in prediction of coronary heart disease mortality: insights from the National Health and Nutrition Examination Survey-III, *International journal of cardiology*, 171 (2014) 390-397.

[11] S. Uthamalingam, E.A. Patvardhan, S. Subramanian, W. Ahmed, W. Martin, M. Daley, R. Capodilupo, Utility of the neutrophil to lymphocyte ratio in predicting long-term outcomes in acute decompensated heart failure, *Am J Cardiol*, 107 (2011) 433-438.

[12] S. Masson, R. Marchioli, D. Mozaffarian, R. Bernasconi, V. Milani, L. Dragani, M. Tacconi, R.M. Marfisi, L. Borgese, V. Cirrincione, O. Febo, E. Nicolis, A.P. Maggioni, G. Tognoni, L. Tavazzi, R. Latini, Plasma n-3 polyunsaturated fatty acids in chronic heart failure in the GISSI-Heart Failure Trial: relation with fish intake, circulating biomarkers, and mortality, *Am Heart J*, 165 (2013) 208-215 e204.

[13] W.S. Harris, S. Masson, S. Barlera, V. Milani, S. Pileggi, M.G. Franzosi, R. Marchioli, G. Tognoni, L. Tavazzi, R. Latini, Red blood cell oleic acid levels reflect olive oil intake while omega-3 levels reflect fish intake and the use of omega-3 acid ethyl esters: The Gruppo Italiano per lo Studio della Sopravvivenza nell'Infarto Miocardico-Heart Failure trial, *Nutr Res*, 36 (2016) 989-994.

- [14] D. Mozaffarian, R.N. Lemaitre, I.B. King, X. Song, D. Spiegelman, F.M. Sacks, E.B. Rimm, D.S. Siscovick, Circulating long-chain omega-3 fatty acids and incidence of congestive heart failure in older adults: the cardiovascular health study: a cohort study, *Annals of internal medicine*, 155 (2011) 160-170.
- [15] M.G. Mazza, S. Lucchi, A.G.M. Tringali, A. Rossetti, E.R. Botti, M. Clerici, Neutrophil/lymphocyte ratio and platelet/lymphocyte ratio in mood disorders: A meta-analysis, *Prog Neuropsychopharmacol Biol Psychiatry*, 84 (2018) 229-236.
- [16] G. Grosso, A. Micek, S. Marventano, S. Castellano, A. Mistretta, A. Pajak, F. Galvano, Dietary n-3 PUFA, fish consumption and depression: A systematic review and meta-analysis of observational studies, *J Affect Disord*, 205 (2016) 269-281.
- [17] J. Liu, C. Tu, M. Zhu, J. Wang, C. Yang, W. Liu, B. Xiong, The clinical course and prognostic factors of severe COVID-19 in Wuhan, China: A retrospective case-control study, *Medicine*, 100 (2021) e23996.
- [18] A. Asher, N.L. Tintle, M. Myers, L. Lockshon, H. Bacareza, W.S. Harris, Blood omega-3 fatty acids and death from COVID-19: A pilot study, *Prostaglandins, leukotrienes, and essential fatty acids*, 166 (2021) 102250.
- [19] R. Zapata B., J.M. Müller, J.E. Vásquez, F. Ravera, G. Lago, E. Cañón, D. Castañeda, M. Pradenas, M. Ramírez-Santana, Omega-3 Index and Clinical Outcomes of Severe COVID-19: Preliminary Results of a Cross-Sectional Study, *International journal of environmental research and public health*, 18 (2021) 7722.
- [20] B. Suh, D.W. Shin, H.-M. Kwon, J.M. Yun, H.-K. Yang, E. Ahn, H. Lee, J.H. Park, B. Cho, Elevated neutrophil to lymphocyte ratio and ischemic stroke risk in generally healthy adults, *PloS one*, 12 (2017) e0183706.

[21] H. Saber, M.Y. Yakoob, P. Shi, W.T. Longstreth, Jr., R.N. Lemaitre, D. Siscovick, K.M. Rexrode, W.C. Willett, D. Mozaffarian, Omega-3 Fatty Acids and Incident Ischemic Stroke and Its Atherothrombotic and Cardioembolic Subtypes in 3 US Cohorts, *Stroke*, 48 (2017) 2678-2685.

[22] M.V. Holmes, I.Y. Millwood, C. Kartsonaki, M.R. Hill, D.A. Bennett, R. Boxall, Y. Guo, X. Xu, Z. Bian, R. Hu, R.G. Walters, J. Chen, M. Ala-Korpela, S. Parish, R.J. Clarke, R. Peto, R. Collins, L. Li, Z. Chen, Lipids, Lipoproteins, and Metabolites and Risk of Myocardial Infarction and Stroke, *J Am Coll Cardiol*, 71 (2018) 620-632.
